# Supplementary material for: Neutral Mo6Q8-clusters with terminal phosphane ligands – a route to water-soluble molecular units of Chevrel phases
Source: Royal Society of Chemistry journal article supplement (doi:10.1039/d1nj05802a), 2021-12-15
Supplement: d1nj05802a1.pdf [file d1nj05802a1.pdf]

Supporting Information

## **Neutral Mo<sub>6</sub>Q<sub>8</sub>-clusters with terminal phosphine ligands – a route to water soluble molecular units of Chevrel phases**

Evgeniya D. Novikova,<sup>a</sup> Alena D. Gassan,<sup>a,b</sup> Anton A. Ivanov,<sup>a</sup> Yuri A. Vorotnikov,<sup>a\*</sup> Michael A. Shestopalov<sup>a\*</sup>

<sup>a</sup>*Nikolaev Institute of Inorganic Chemistry SB RAS, 3 acad. Lavrentiev ave., 630090 Novosibirsk, Russia, E-mail: vorotnikov@niic.nsc.ru, shtopy@niic.nsc.ru*

<sup>b</sup>*Novosibirsk State University, 2 Pirogova st., 630090 Novosibirsk, Russia.*

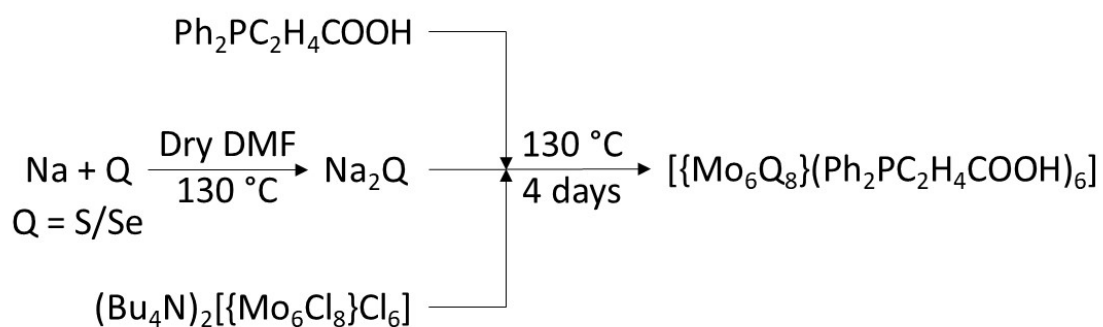

**Figure S1.** The schematic illustration of the synthesis of **1** and **2**.

**Table S1.** List of solubility of **1** and **2** in common solvents.

| Solvent       | <b>1</b> | <b>2</b> | sodium salt of <b>1</b> | sodium salt of <b>2</b> |
|---------------|----------|----------|-------------------------|-------------------------|
| DMF           | +        | +        | -                       | -                       |
| DMSO          | +        | +        | -                       | -                       |
| Acetone       | -        | -        | -                       | -                       |
| Acetonitrile  | -        | -        | -                       | -                       |
| Ethanol       | +        | +        | -                       | -                       |
| Diethyl ether | -        | -        | -                       | -                       |
| Water         | -        | -        | +                       | +                       |

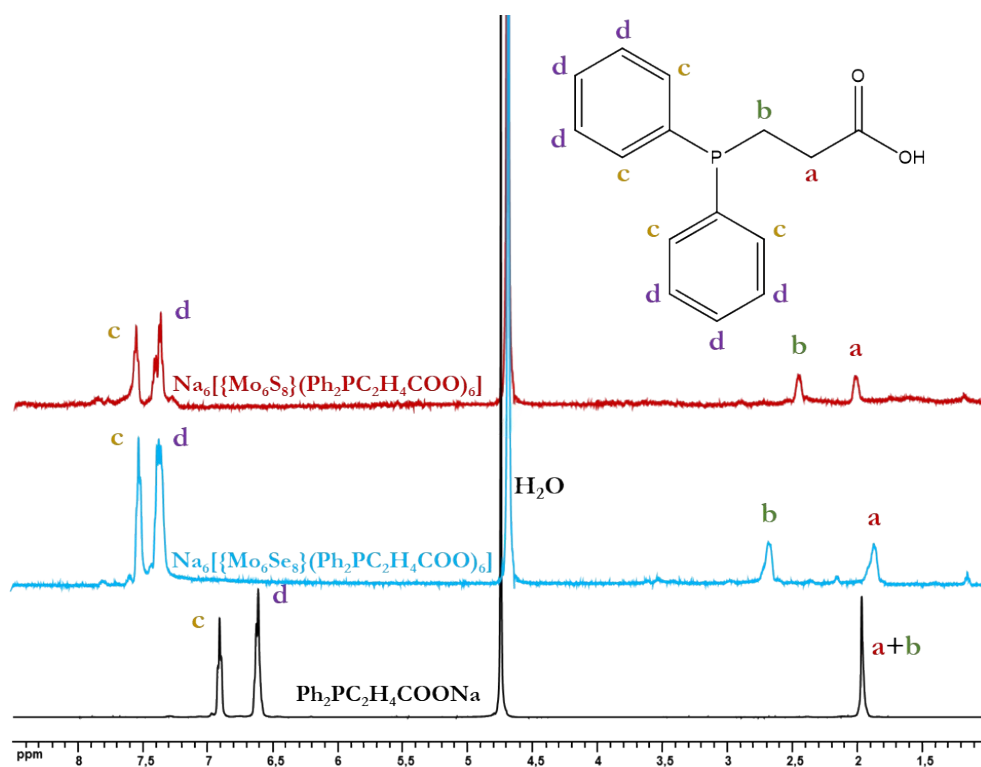

**Figure S2.** <sup>1</sup>H NMR spectra of Ph<sub>2</sub>PC<sub>2</sub>H<sub>4</sub>COOH and sodium salts of **1** and **2**.

**Table S2.** Selected crystallographic parameters of the single-crystal X-ray diffraction structural analysis for **1** and **2**

| Parameter                                                                | <b>1</b> ·4.5H <sub>2</sub> O·2.5Et <sub>2</sub> O                                              | <b>2</b> ·4.5H <sub>2</sub> O·2.5Et <sub>2</sub> O                                               |
|--------------------------------------------------------------------------|-------------------------------------------------------------------------------------------------|--------------------------------------------------------------------------------------------------|
| Empirical formula                                                        | C <sub>100</sub> H <sub>124</sub> Mo <sub>6</sub> O <sub>19</sub> P <sub>6</sub> S <sub>8</sub> | C <sub>100</sub> H <sub>124</sub> Mo <sub>6</sub> O <sub>19</sub> P <sub>6</sub> Se <sub>8</sub> |
| Formula weight                                                           | 2647.92                                                                                         | 3023.12                                                                                          |
| Crystal system                                                           | Triclinic                                                                                       | Triclinic                                                                                        |
| Space group                                                              | P $\bar{1}$                                                                                     | P $\bar{1}$                                                                                      |
| Z                                                                        | 1                                                                                               | 1                                                                                                |
| T (K)                                                                    | 150(2)                                                                                          | 150(2)                                                                                           |
| a (Å)                                                                    | 14.2549(6)                                                                                      | 14.3781(9)                                                                                       |
| b (Å)                                                                    | 15.2377(5)                                                                                      | 15.2185(9)                                                                                       |
| c (Å)                                                                    | 17.0827(7)                                                                                      | 17.2172(10)                                                                                      |
| $\alpha$ (°)                                                             | 98.206(2)                                                                                       | 97.527(2)                                                                                        |
| $\beta$ (°)                                                              | 108.992(2)                                                                                      | 109.711(2)                                                                                       |
| $\gamma$ (°)                                                             | 114.838(1)                                                                                      | 114.890(2)                                                                                       |
| V (Å <sup>3</sup> )                                                      | 3010.5(2)                                                                                       | 3048.4(3)                                                                                        |
| D <sub>calc</sub> (g cm <sup>-3</sup> )                                  | 1.461                                                                                           | 1.647                                                                                            |
| $\mu$ (mm <sup>-1</sup> )                                                | 0.882                                                                                           | 3.122                                                                                            |
| Crystal size (mm)                                                        | 0.1 × 0.08 × 0.03                                                                               | 0.09 × 0.09 × 0.05                                                                               |
| $\vartheta$ scan range (°)                                               | 1.973 to 30.595                                                                                 | 2.278 to 25.737                                                                                  |
|                                                                          | -20 ≤ h ≤ 20                                                                                    | -17 ≤ h ≤ 17                                                                                     |
| Indices ranges                                                           | -21 ≤ k ≤ 21                                                                                    | -18 ≤ k ≤ 18                                                                                     |
|                                                                          | -23 ≤ l ≤ 23                                                                                    | -20 ≤ l ≤ 20                                                                                     |
| Reflections collected                                                    | 60018                                                                                           | 47618                                                                                            |
| Independent reflections                                                  | 17241                                                                                           | 11614                                                                                            |
| Observed reflections [I > 2σ(I)]                                         | 11944                                                                                           | 6738                                                                                             |
| Parameters refined                                                       | 748                                                                                             | 746                                                                                              |
| R <sub>int</sub>                                                         | 0.0450                                                                                          | 0.1048                                                                                           |
| Goodness-of-fit (GOF) on F <sup>2</sup>                                  | 1.027                                                                                           | 0.948                                                                                            |
| R <sub>1</sub> <sup>a</sup> /wR <sub>2</sub> <sup>b</sup> [I > 2σ(I)]    | 0.0460/0.1277                                                                                   | 0.0551/0.1328                                                                                    |
| R <sub>1</sub> <sup>a</sup> /wR <sub>2</sub> <sup>b</sup> (all data)     | 0.0757/0.1408                                                                                   | 0.1159/0.1539                                                                                    |
| $\Delta\rho_{\max}/\Delta\rho_{\min}$ (e <sup>-</sup> ·Å <sup>-3</sup> ) | 1.345/-0.988                                                                                    | 1.179/-1.936                                                                                     |

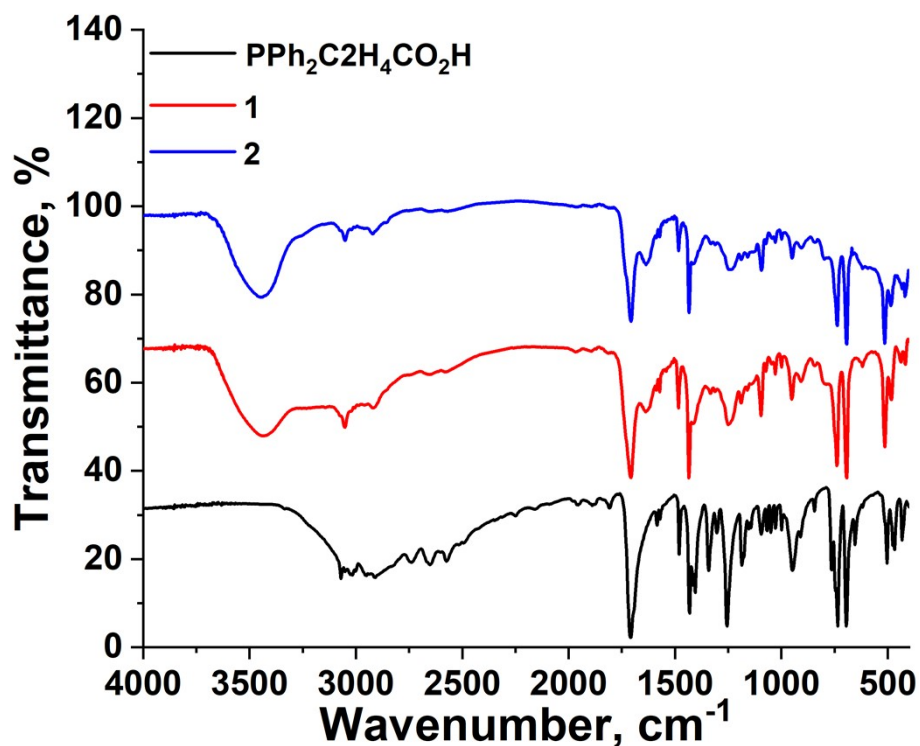

**Figure S3.** FTIR spectra of the pro-ligand and compounds **1** and **2**.

**Table S3.** Main intracluster distances in **1** and **2** and related compounds

| Compound                                                                           | Mo–Mo, Å      | Mo–Q, Å       | Mo–P, Å       |
|------------------------------------------------------------------------------------|---------------|---------------|---------------|
| <b>1</b> ·4.5H <sub>2</sub> O·2.5Et <sub>2</sub> O                                 | 2.6540(4) –   | 2.4306(8) –   | 2.5444(9) –   |
|                                                                                    | 2.6668(4)     | 2.4648(8)     | 2.5594(8)     |
| <b>2</b> ·4.5H <sub>2</sub> O·2.5Et <sub>2</sub> O                                 | 2.6947(10) –  | 2.531(1) –    | 2.544(2) –    |
|                                                                                    | 2.7049(9)     | 2.574(1)      | 2.560(2)      |
| [{Mo <sub>6</sub> S <sub>8</sub> }(PEt <sub>3</sub> ) <sub>6</sub> ] <sup>1</sup>  | 2.662 – 2.664 | 2.438 – 2.449 | 2.527         |
| [{Mo <sub>6</sub> S <sub>8</sub> }(PEt <sub>3</sub> ) <sub>6</sub> ] <sup>2</sup>  | 2.658 – 2.666 | 2.445 – 2.463 | 2.525 – 2.537 |
| [{Mo <sub>6</sub> Se <sub>8</sub> }(PEt <sub>3</sub> ) <sub>6</sub> ] <sup>3</sup> | 2.700 – 2.708 | 2.555 – 2.566 | 2.537 – 2.548 |

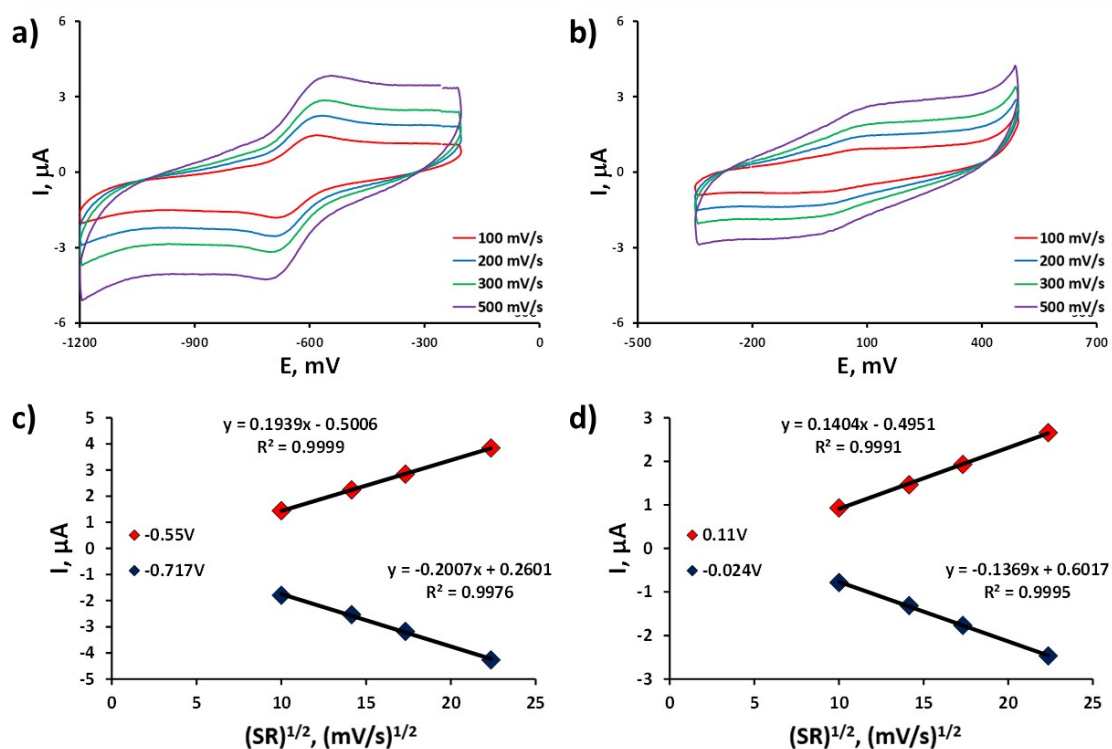

**Figure S4.** Cyclic voltammograms of **1** at various scan rate (a, b) and linear dependence of the anodic and cathodic peak current upon square root of the potential scan rate (c, d).

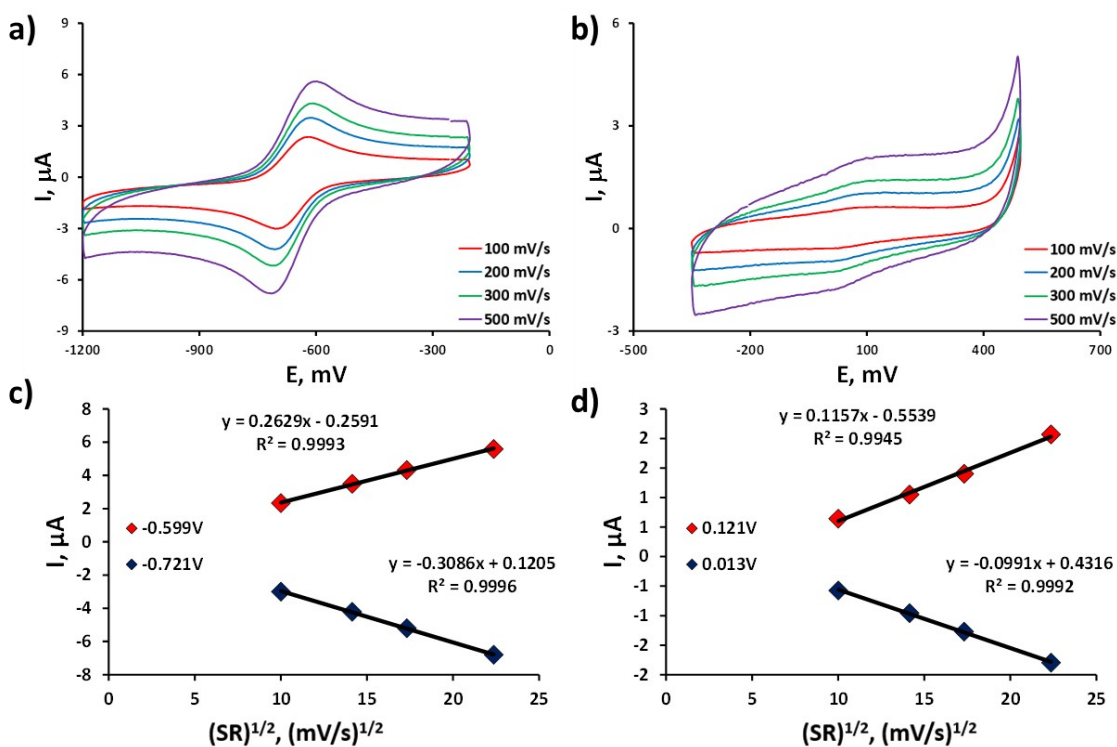

**Figure S5.** Cyclic voltammograms of **2** at various scan rate (a, b) and linear dependence of the anodic and cathodic peak current upon square root of the potential scan rate (c, d).

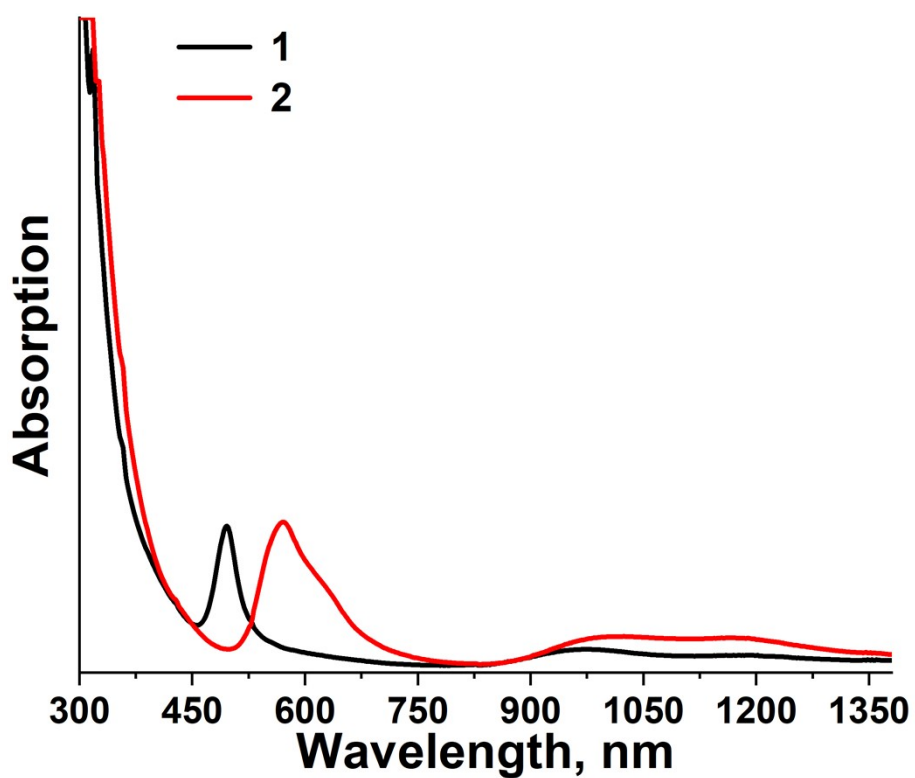

Figure S6. Absorption spectra of 1 and 2 in DMF.

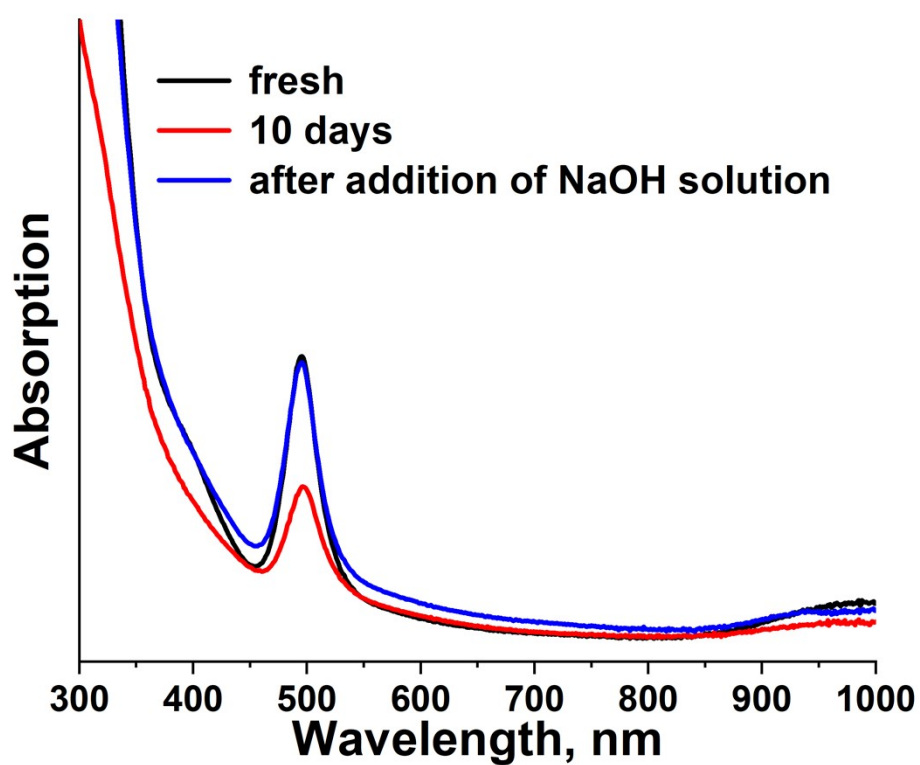

Figure S7. Absorption spectra of sodium salt of 1 in water: fresh (black), aged for 10 days (red), and after addition of NaOH solution (blue).

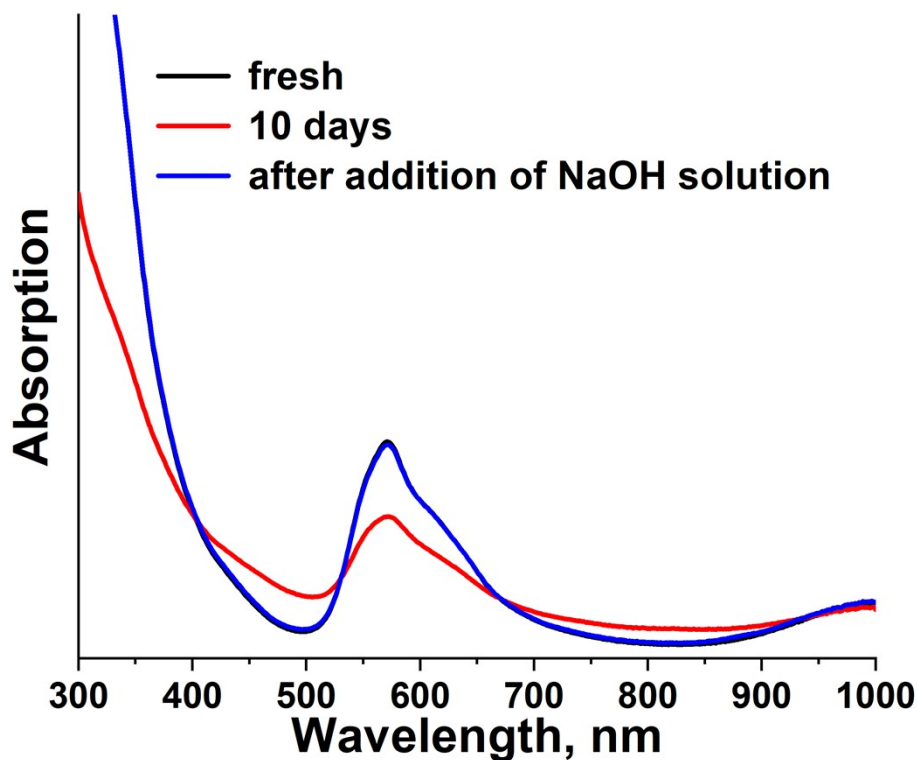

**Figure S8.** Absorption spectra of sodium salt of 2 in water: fresh (black), aged for 10 days (red), and after addition of NaOH solution (blue).

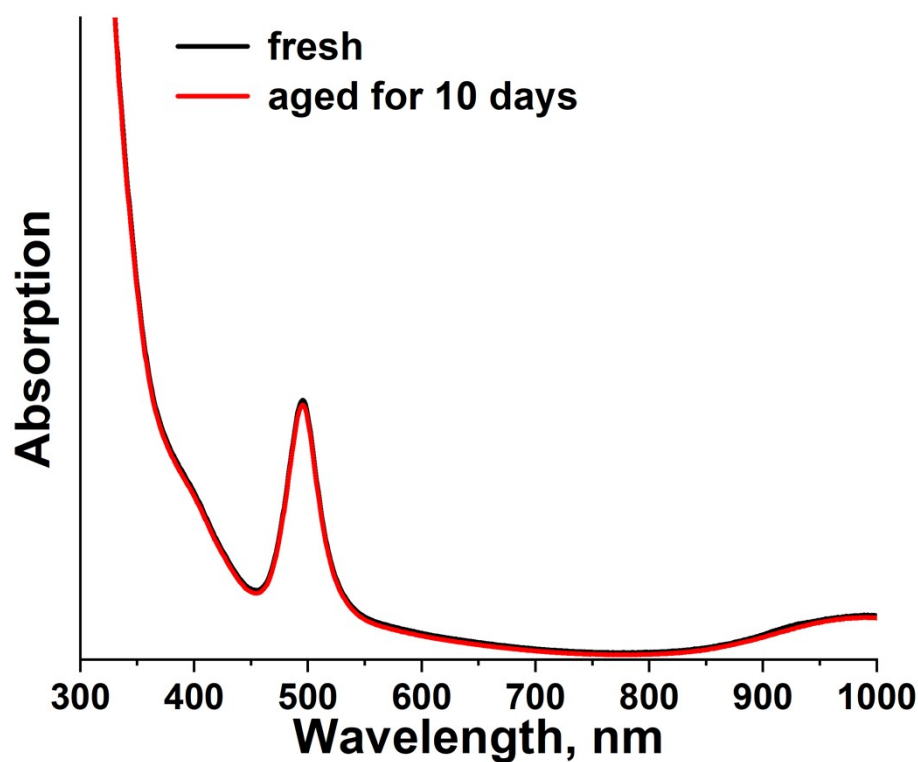

**Figure S9.** Absorption spectra of sodium salt of 1 in water aged for 10 days at pH ~ 13.

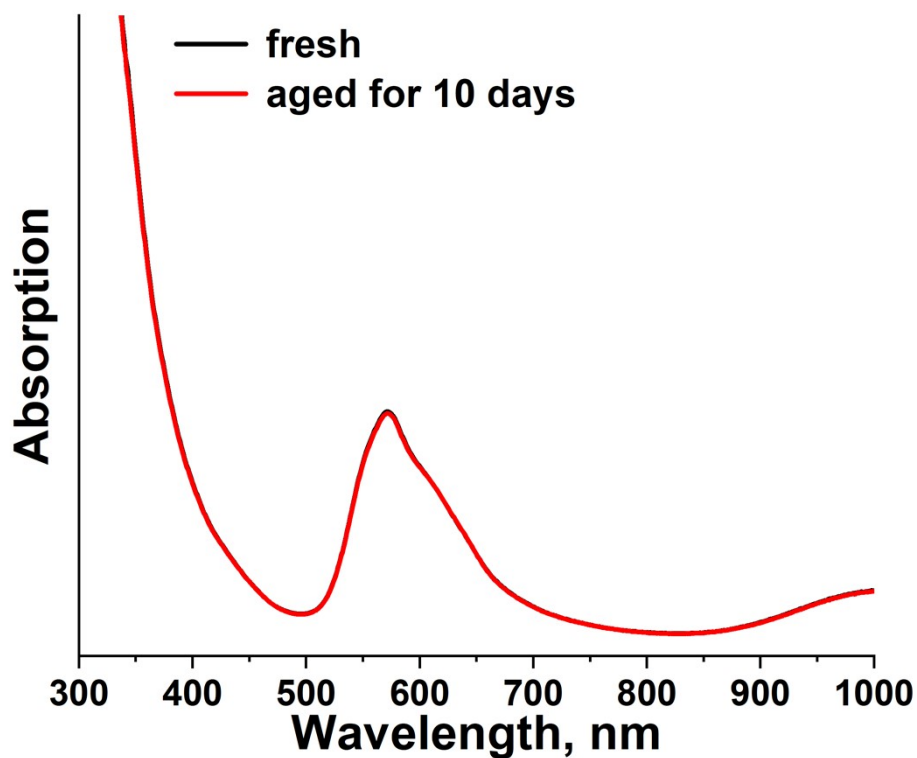

**Figure S10.** Absorption spectra of sodium salt of **2** in water aged for 10 days at pH  $\sim$  13.

#### References

1. T. Saito, N. Yamamoto, T. Yamagata and H. Imoto, *J. Am. Chem. Soc.*, 1988, **110**, 1646-1647. <https://doi.org/10.1021/ja00213a060>
2. T. Matsumoto, R. Namiki and H.-C. Chang, *Eur J Inorg Chem*, 2018, **2018**, 3900-3904. <https://doi.org/10.1002/ejic.201800587>
3. T. Saito, N. Yamamoto, T. Nagase, T. Tsuboi, K. Kobayashi, T. Yamagata, H. Imoto and K. Unoura, *Inorg. Chem.*, 1990, **29**, 764-770. <https://doi.org/10.1021/ic00329a039>
